# Supplementary material for: Modified Atkins diet induces subacute selective ragged‐red‐fiber lysis in mitochondrial myopathy patients
Source: PubMed Central journal article supplement (PMC5090657; doi:10.15252/emmm.201606592), 2016-09-19
Supplement: EMMM-8-1234-s003.pdf [file EMMM-8-1234-s003.pdf]

Source data for Figure 2C

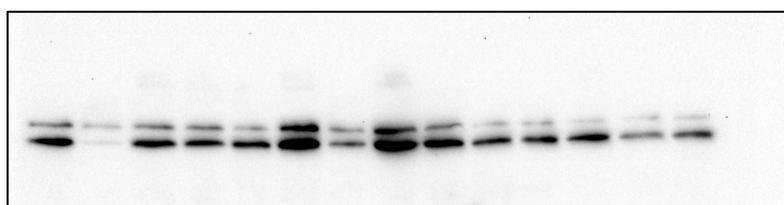

- p62  
- beta-actin

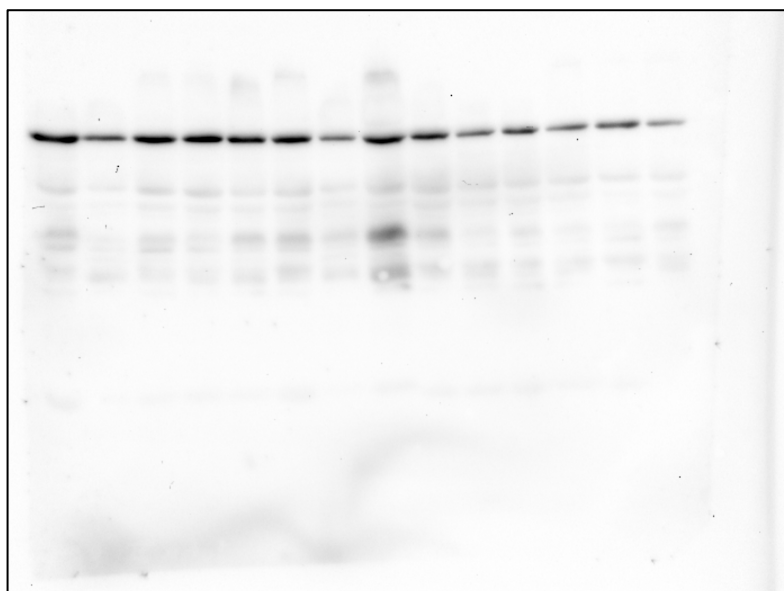

- pax7
